# Supplementary material
Source: publisher site journal article supplement (https://www.dovepress.com/article/372428)
Supplement: Supplementary file 1 [file get_supplementary_file.php]

## Supplementary materials

## Supplementary Annex 1: Questionnaire

**Part I: General questions**

1. Did the surgical care pattern differ during the COVID-19 and before the pandemic at JMC surgical departments?
2. Yes B. No
3. If yes, proceed to evaluate the pattern of perioperative surgical patient care, equipment handling and operation room management during COVID-19 pandemic in terms of 7 domains (A. infection prevention and PPE; B. patient preparation/preoperative phase; C. intraoperative phase; D. equipment handling process and status of CSR; E. operation room management; F. Anesthesia care and G. recovery room/ICU care in postoperative phase ) at JMC among 7 surgical streams (A. Ophthalmology; B. ENT/maxilla-facial; C. Orthopedics; D. General surgery; E. Gyne/obs; F. Pediatric and G. Neuro surgery). Please provide score 0-4 (***0-not at all; 1-rarely; 2-sometimes; 3-most of the time; 4-frequently***) to listed activities if applied at JMC surgical streams.

**Part II: Domain specific questions**

1. **Infection prevention and PPE use related questions**
2. Did all surgical staff apply Covid-19 preventive measures? A. Yes B. No
3. If yes, at what extent? Score 0-4

A. Hand washing/ sanitizer use

1. Social distancing
2. PPE usage as indicated
3. Avoid touching faces (eyes, nose), stairs and other equipments
4. Did all surgical patients apply Covid-19 preventive measures? A. Yes B. No
5. If yes, at what extent? Score 0-4

A. Hand washing/ sanitizer use

1. Social distancing
2. PPE usage as indicated
3. Avoid touching faces (eyes, nose), stairs and other equipments
4. **Patient preparation related questions in preoperative phase, score 0-4**
5. Did all staff apply Covid-19 preventive measures whenever they approach patients?
6. Did patient risk assessment for Covid-19 conducted prior to surgery?
7. If yes, did low risk and high risk patients managed as per surgical patient guideline separately?
8. Did patients screening for Covid-19 prior to surgery?
9. If yes, did Covid-19 positive and negative patients managed as per surgical patient guideline separately?
10. Did elective patients planned for surgery?
11. **Intraoperative surgical patient care, score 0-4**
12. Did scrubbing technique differ during Covid-19?
13. Did the proper donning/doffing area and technique established?
14. Did all surgical staff remove personal articles such as jewelry, watches, mobile phones, etc., and wear disposable surgical caps?
15. Did disinfecting the surgical site skin differ during Covid-19?
16. Did patient drapping technique differ during Covid-19?
17. Did Trendelenburg position time reduced as much as possible?
18. Did surgery performed by a recommended technique (open or minimally invasive surgery) during the pandemic?
19. Did surgeons use cautery smoke during Covid-19?
20. Did surgeons apply strict haemostasis?
21. Did surgeons apply liberal use of suction?
22. Did charring of tissues avoided to minimize the creation of smoke?
23. Did PPE usage differ for high risk/Covid-positive patients and low risk/Covid-negative patients?
24. Did all scrubbed surgical staff wear:
25. two-layer surgical caps
26. three-layer sterile gloves
27. two surgical masks/ N95 masks
28. two pairs of shoe covers
29. two disposable surgical gowns
30. one medical protective clothing
31. one goggles
32. one protective screen
33. one boot cover
34. **Equipment handling and status of CSR practice, score 0-4**
35. Did the CSR practice differ during Covid-19?
36. Did equipment handling (disposing and sterilization process) differ during Covid-19?
37. Did equipment handling differ for low and high risk patients for Covid-19?
38. Did surgical equipment used for confirmed or suspected COVID-19 patients cleaned separately at CSR?
39. **Operating room management related questions, score 0-4**
40. Did surgical staff apply a proper separated OT entry and exit pattern and order?
41. Did OR ventilation and ambient temperature adjusted as the standard during Covid-19?
42. Did scrubbed surgical staff wait 20 minutes after intubation to enter into OT?
43. Did cleaners wait 20 minutes after the patient is shifted out to start cleaning the theatre?
44. Did surgeries performed with the minimum number of OT staff members by facilitating telemedicine for other staff and students?
45. Did surgery performed by the most qualified surgeon?
46. Did staff restricted inside OT whilst intubation and extubation?
47. Did senior specialists (age>60 years) and those with co-morbidities abstained from surgery team?
48. Did the OT cleaned and sterilized post-surgery with effective fumigation and disinfectant solution?
49. Did minimal possible furniture and equipment in the procedure room reserved?
50. Did equipment cleaned separately from other materials?
51. Did the detachment of catheters/cables from the device done with caution, as it could release fluid or air or both?
52. **Anesthesia care related questions, score 0-4**
53. Did intubation performed with strict care and with less staff as it is an aerosol generating procedure?
54. Did other surgical staff dis allowed in the OR during intubation unless concurrent management of bleeding etc. requires their presence?
55. Did regional anaesthesia preferred over general anaesthesia whenever possible during the pandemic?
56. Did a high-quality heat and moisture exchange filter) used between the facemask and breathing circuit during the time of intubation or extubation
57. Did adequate pre oxygenate with 100% O2 for at least 5–10 min applied?
58. Did rapid sequence induction, adequate neuromuscular relaxation applied?
59. Did avoidance of aerosol-generating processes (airway manipulation, face mask ventilation, suction) applied?
60. Did proper PPE use and disinfection of shared equipment applied?
61. **Postoperative surgical patient care related questions at RR/ICU**
62. Is there a separate/isolated recovery room for high risk or infected cases?
63. Did use of PPE and other preventive measures of Covid-19 maintained at RR/ICU?
64. Did proper equipment handling and disinfection seriously applied at RR/ICU?
65. Did the patients provided adequate analgesics?

## Supplementary Annex 2: Consent form

A questionnaire developed to assess pattern of perioperative surgical patient care, equipment handling and operation room management during COVID-19 pandemic at Jimma medical center and comparison with the standard guidelines. Please fill the blank space if space provided and mark if the alternatives are enumerated.

Dear respondents, you have full rights either to participate or refuse the study which aimed to assess the occupational hazard of anesthetics exposure on reproductive health. We hope the finding of this study will help all the professionals and patients involved in the study to enhance perioperative surgical care of patients during COVID-19 pandemic, by implementing standard guidelines. Thus, please reply thoroughly if you are voluntary to participate in the study and mark (tick/X) if you implemented those guidelines/recommendations at JMC.

Thank you!!!!

**Signature to participate:** --------------------- **Date:**--------------------------
